# Supplementary material
Source: Hindawi journal article supplement (doi:10.1155/2011/720798)

## **SUPPLEMENTAL DATA**

**Figure S1: Western blot analysis of the in vitro Flag-Stn1 protein.** Aliquots of rabbit reticulocyte lysates programmed with either water (Mock) or the pcDNA3.1-Flag-Stn1 plasmid (Flag-Stn1) were separated by SDS-PAGE electrophoresis and were immunoblotted with the Stn1/OBFC1 antibody and anti-Flag M2 antibody. A single species of 45 kDa was detected by the two antibodies in the Stn1-programmed lysate but not the Mock lysate.

**Figure S2: Relative efficacy with which the different aptamers block the interaction of Flag-tagged proteins with the M2 antibody.** A) Sequence and graphical representation of the aptamers used. Aptamers were designed to contain one (ABA), two (2XABA) or three (3XABA) copies of the bipartite consensus (CCTTANNTGTCTWCC, where N=A/C/G/T). B) Relative efficacy with which the different aptamers are blocking the interaction of Flag-tagged proteins with the M2 antibody. Magnetic beads coated with the M2 antibody were incubated in the absence (No comp) or presence of the indicated competitor (ABA, 2XABA, 3XABA, 3XCTR, 3XFLAG; 30  $\mu$ M each). In vitro translated [<sup>35</sup>S]-labeled Flag-TRF2 <sup>$\Delta$ B</sup> was then added and the amount captured by the beads was counted by scintillation. The amount of [<sup>35</sup>S]-labeled protein captured in the absence of competitor (No Comp) was arbitrarily set to 100%. In both experiments, beads coated with normal mouse IgG were included as negative control for the capture (IgG). Data represent the mean  $\pm$  S.D. (n=1-3).

Figure S1

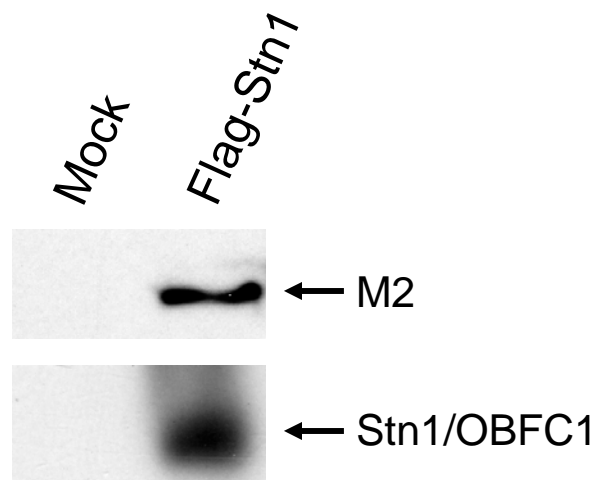

Figure S2A

|       |                                                          |         |    |             |       |             |       |             |       |
|-------|----------------------------------------------------------|---------|----|-------------|-------|-------------|-------|-------------|-------|
| ABA   | TCGAT                                                    | TTCCTTA | GT | TGTCTTCCTTA | GTGAG |             |       |             |       |
| 2XABA | TCGAT                                                    | TTCCTTA | GT | TGTCTTCCTTA | GT    | TGTCTTCCTTA | GTGAG |             |       |
| 3XABA | TCGAT                                                    | TTCCTTA | GT | TGTCTTCCTTA | GT    | TGTCTTCCTTA | GT    | TGTCTTCCTTA | GTGAG |
| 3XCTR | TCGATAGATGTAGTGCACAGATGGTGTGCACAGATGGTGTGCACAGATGGTGTGAG |         |    |             |       |             |       |             |       |

Figure S2B

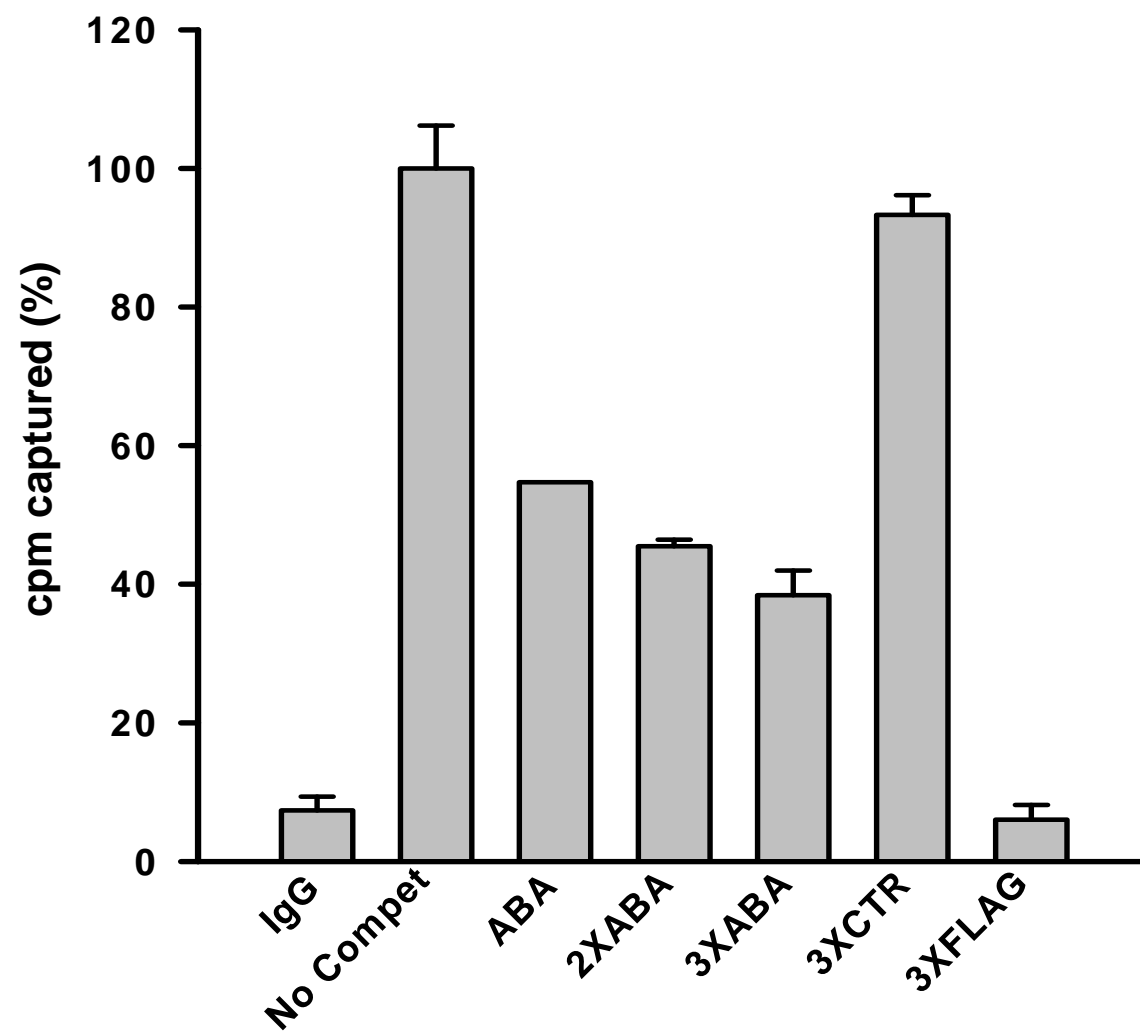

Supplement: f1 [file 720798.f1.pdf]
